# Supplementary material
Source: publisher figshare collection journal article supplement (https://gsajournals.figshare.com/ndownloader/files/27965721)
Supplement: Supplementary file 1 [file 27965721]

## Sheet: ISSeeker_vs_ISCompare
Table S8. Comparison of ISCompare and ISSeeker using P. aeruginosa genomes.
					ISSeeker				ISCompare
IS	Query		Reference Strain		DLIS	Detected by Manual Verification	Total	False Positives	DLIS	Detected by Manual Verification	Total	False Positives
	Strain	Accession Number	Strain	Accession Number
ISPa11_IS110_IS1111	PAO1	NC_002516.2	PAO1161	NZ_CP032126.1	0	0	0	6	0	0	0	0
ISPa11_IS110_IS1111	PAO1	NC_002516.2	W16407	NZ_CP008869.2	3	3	6	0	5	1	6	0
ISPa37_IS30	W16407	NZ_CP008869.2	PAO1	NC_002516.2	1	0	1	0	1	0	1	0
ISPa11_IS110_IS1111	PAO1	NC_002516.2	LYT4	ASM1297170v1	3	3	6	1	5	1	6	0
IS222_IS3_IS3	LYT4	ASM1297170v1	PAO1	NC_002516.2	1	0	1	2	1	0	1	0
ISPa11_IS110_IS1111	PAO1	NC_002516.2	CDN129	NZ_CP056774.1	2	4	6	0	4	2	6	0
ISAzvi4_IS110_IS1111	CDN129	NZ_CP056774.1	PAO1	NC_002516.2	0	0	0	0	2	0	2	0
ISPa11_IS110_IS1111	PAO1	NC_002516.2	PA_154197	NZ_CP014866.1	2	4	6	2	4	2	6	0
ISPa11_IS110_IS1111	PAO1	NC_002516.2	VRFPA04	NZ_CP008739.1	1	5	6	1	4	2	6	0
ISPa11_IS110_IS1111	PAO1	NC_002516.2	AR_0446	NZ_CP029660.1	0	6	6	1	3	3	6	0
ISPa11_IS110_IS1111	PAO1	NC_002516.2	CMC-115	NZ_CP046602.1	1	5	6	1	5	1	6	0
ISPa57_IS3_IS3	CMC-115	NZ_CP046602.1	PAO1	NC_002516.2	0	4	4	1	4	0	4	0
ISPa11_IS110_IS1111	PAO1	NC_002516.2	AR441	ASM307369v1	0	6	6	2	3	3	6	0

## Sheet: ISseeker
Shadings:	FP	TP	TP*
Query:	PAO1	NC_002516.2
Reference:	PAO1161	NZ_CP032126.1
IS:	ISPa11_IS110_IS1111
type	id	mate_id	offset_from_previous	is_element	genome	contig_name	%_id	match_len	feat_type	flank_begin_end	orientation	contig_flank_begin_base	contig_flank_end_base	is_annotated	reference	nearest_base	after_gene	in_gene	before_gene	match_quality	contig_count	contig_pos
Flank	1	2	499826	ISPa11_IS110_IS1111	NC_002516.2	NC_002516.2	100000	500	F	E	R	499329	499828	1	NZ_CP032126.1	499826	1373	D3C65_RS09340		W	1	NC_002516.2_ER_499329_499828
Flank	2	1	1373	ISPa11_IS110_IS1111	NC_002516.2	NC_002516.2	100000	500	F	B	R	501201	501700	1	NZ_CP032126.1	501199		D3C65_RS09340		W	1	NC_002516.2_BR_501201_501700
Flank	3	4	539716	ISPa11_IS110_IS1111	NC_002516.2	NC_002516.2	100000	500	F	E	R	4474915	4475414	1	NZ_CP032126.1	1040915	1373	D3C65_RS09340		W	1	NC_002516.2_EF_4474915_4475414
Flank	4	3	1373	ISPa11_IS110_IS1111	NC_002516.2	NC_002516.2	100000	500	F	B	R	4473043	4473542	1	NZ_CP032126.1	1042288		D3C65_RS09340		W	1	NC_002516.2_BF_4473043_4473542
Flank	5	6	630172	ISPa11_IS110_IS1111	NC_002516.2	NC_002516.2	100000	500	F	B	F	3843371	3843870	1	NZ_CP032126.1	1672460	1373	D3C65_RS09340		W	1	NC_002516.2_BR_3843371_3843870
Flank	6	5	1373	ISPa11_IS110_IS1111	NC_002516.2	NC_002516.2	100000	500	F	E	F	3841499	3841998	1	NZ_CP032126.1	1673833		D3C65_RS09340		W	1	NC_002516.2_ER_3841499_3841998
Flank	7	8	797140	ISPa11_IS110_IS1111	NC_002516.2	NC_002516.2	100000	500	F	B	F	3044847	3045346	1	NZ_CP032126.1	2470973	1373	D3C65_RS21010		W	1	NC_002516.2_BR_3044847_3045346
Flank	8	7	1373	ISPa11_IS110_IS1111	NC_002516.2	NC_002516.2	100000	500	F	E	F	3042975	3043474	1	NZ_CP032126.1	2472346		D3C65_RS21010		W	1	NC_002516.2_ER_3042975_3043474
Flank	9	10	485126	ISPa11_IS110_IS1111	NC_002516.2	NC_002516.2	98603	500	F	E	R	2558240	2558739	1	NZ_CP032126.1	2957472	1372	D3C65_RS21010		W	1	NC_002516.2_EF_2558240_2558739
Flank	10	9	1372	ISPa11_IS110_IS1111	NC_002516.2	NC_002516.2	100000	500	F	B	R	2556368	2556867	1	NZ_CP032126.1	2958844		D3C65_RS21010		W	1	NC_002516.2_BF_2556368_2556867
Flank	11	12	2543086	ISPa11_IS110_IS1111	NC_002516.2	NC_002516.2	100000	500	F	E	R	5382021	5382520	1	NZ_CP032126.1	5501930	1373	D3C65_RS30230		W	1	NC_002516.2_ER_5382021_5382520
Flank	12	11	1373	ISPa11_IS110_IS1111	NC_002516.2	NC_002516.2	100000	500	F	B	R	5383893	5384392	1	NZ_CP032126.1	5503303		D3C65_RS30230		W	1	NC_002516.2_BR_5383893_5384392
IS	13			ISPa11_IS110_IS1111	NZ_CP032126.1		100000	1372	EMBED	X	R	499827	501198	0
IS	14			ISPa11_IS110_IS1111	NZ_CP032126.1		100000	1372	EMBED	X	R	1040916	1042287	0
IS	15			ISPa11_IS110_IS1111	NZ_CP032126.1		100000	1372	EMBED	X	F	1672461	1673832	0
IS	16			ISPa11_IS110_IS1111	NZ_CP032126.1		100000	1372	EMBED	X	F	2470974	2472345	0
IS	17			ISPa11_IS110_IS1111	NZ_CP032126.1		100000	1372	EMBED	X	R	5501931	5503302	0
IS	18			ISPa11_IS110_IS1111	NZ_CP032126.1		99927	1371	EMBED	X	R	2957473	2958843	0
Query:	PAO1	NC_002516.2
Reference:	W16407	NZ_CP008869.2
IS:	ISPa11_IS110_IS1111
type	id	mate_id	offset_from_previous	is_element	genome	contig_name	%_id	match_len	feat_type	flank_begin_end	orientation	contig_flank_begin_base	contig_flank_end_base	is_annotated	reference	nearest_base	after_gene	in_gene	before_gene	match_quality	contig_count	contig_pos
Flank	1		495060	ISPa11_IS110_IS1111	NC_002516.2	NC_002516.2	97921	478	F	B	R	501201	501700	1	NZ_CP008869.2	495060	-81	HV98_RS30455		P	1	NC_002516.2_BR_501201_501700
Flank	2		81	ISPa11_IS110_IS1111	NC_002516.2	NC_002516.2	99000	500	F	E	R	499329	499828	1	NZ_CP008869.2	495141		HV98_RS30455		W	1	NC_002516.2_ER_499329_499828
Flank	3	4	587643	ISPa11_IS110_IS1111	NC_002516.2	NC_002516.2	98400	500	F	E	R	4474915	4475414	1	NZ_CP008869.2	1082784	-1	HV98_RS30455		W	1	NC_002516.2_EF_4474915_4475414
Flank	4	3	1	ISPa11_IS110_IS1111	NC_002516.2	NC_002516.2	99800	500	F	B	R	4473043	4473542	1	NZ_CP008869.2	1082785		HV98_RS30455		W	1	NC_002516.2_BF_4473043_4473542
Flank	5		671113	ISPa11_IS110_IS1111	NC_002516.2	NC_002516.2	100000	500	F	E	F	3841499	3841998	1	NZ_CP008869.2	1753898	-201	HV98_RS30455		W	1	NC_002516.2_ER_3841499_3841998
Flank	6		201	ISPa11_IS110_IS1111	NC_002516.2	NC_002516.2	98600	500	F	B	F	3843371	3843870	1	NZ_CP008869.2	1754099		HV98_RS30455		W	1	NC_002516.2_BR_3843371_3843870
Flank	7	8	980104	ISPa11_IS110_IS1111	NC_002516.2	NC_002516.2	99000	500	F	B	F	3044847	3045346	1	NZ_CP008869.2	2734203	-1	HV98_RS30455		W	1	NC_002516.2_BR_3044847_3045346
Flank	8	7	1	ISPa11_IS110_IS1111	NC_002516.2	NC_002516.2	99600	500	F	E	F	3042975	3043474	1	NZ_CP008869.2	2734204		HV98_RS30455		W	1	NC_002516.2_ER_3042975_3043474
Flank	9		500163	ISPa11_IS110_IS1111	NC_002516.2	NC_002516.2	98004	500	F	B	R	2556368	2556867	1	NZ_CP008869.2	3234367		HV98_RS30455		W	1	NC_002516.2_BF_2556368_2556867
Flank	10	11	2609776	ISPa11_IS110_IS1111	NC_002516.2	NC_002516.2	99800	500	F	E	R	5382021	5382520	1	NZ_CP008869.2	5844143	-1	HV98_RS30455		W	1	NC_002516.2_ER_5382021_5382520
Flank	11	10	1	ISPa11_IS110_IS1111	NC_002516.2	NC_002516.2	100000	500	F	B	R	5383893	5384392	1	NZ_CP008869.2	5844144		HV98_RS30455		W	1	NC_002516.2_BR_5383893_5384392
Flank	12			ISPa11_IS110_IS1111	NC_002516.2	NC_002516.2	93585	264	F	E	R	2558240	2558739	0	NZ_CP008869.2	3234498				P	1	NC_002516.2_EF_2558240_2558739
Query:	PAO1	NC_002516.2
Reference:	LYT4	ASM1297170v1
IS:	ISPa11_IS110_IS1111
type	id	mate_id	offset_from_previous	is_element	genome	contig_name	%_id	match_len	feat_type	flank_begin_end	orientation	contig_flank_begin_base	contig_flank_end_base	is_annotated	reference	nearest_base	after_gene	in_gene	before_gene	match_quality	contig_count	contig_pos
Flank	1		503061	ISPa11_IS110_IS1111	NC_002516.2	NC_002516.2	97930	479	F	B	R	501201	501700	1	NZ_CP052759.1	503061		HH306_RS08515		P	1	NC_002516.2_BR_501201_501700
Flank	2		82	ISPa11_IS110_IS1111	NC_002516.2	NC_002516.2	98800	500	F	E	R	499329	499828	1	NZ_CP052759.1	503143		HH306_RS08515		W	1	NC_002516.2_ER_499329_499828
Flank	3	4	562623	ISPa11_IS110_IS1111	NC_002516.2	NC_002516.2	99000	500	F	E	R	4474915	4475414	1	NZ_CP052759.1	1065766		HH306_RS08515		W	1	NC_002516.2_EF_4474915_4475414
Flank	4	3	1	ISPa11_IS110_IS1111	NC_002516.2	NC_002516.2	99800	500	F	B	R	4473043	4473542	1	NZ_CP052759.1	1065767		HH306_RS08515		W	1	NC_002516.2_BF_4473043_4473542
Flank	5		629454	ISPa11_IS110_IS1111	NC_002516.2	NC_002516.2	97436	39	F	E	R	2558240	2558739	1	NZ_CP052759.1	1695221		HH306_RS08515		P	1	NC_002516.2_EF_2558240_2558739
Flank	6		30436	ISPa11_IS110_IS1111	NC_002516.2	NC_002516.2	98400	500	F	E	F	3841499	3841998	1	NZ_CP052759.1	1725657		HH306_RS08515		W	1	NC_002516.2_ER_3841499_3841998
Flank	7	8	862735	ISPa11_IS110_IS1111	NC_002516.2	NC_002516.2	99400	500	F	B	F	3044847	3045346	1	NZ_CP052759.1	2588392		HH306_RS23585		W	1	NC_002516.2_BR_3044847_3045346
Flank	8	7	1	ISPa11_IS110_IS1111	NC_002516.2	NC_002516.2	99800	500	F	E	F	3042975	3043474	1	NZ_CP052759.1	2588393		HH306_RS23585		W	1	NC_002516.2_ER_3042975_3043474
Flank	9		517506	ISPa11_IS110_IS1111	NC_002516.2	NC_002516.2	98848	434	F	B	R	2556368	2556867	1	NZ_CP052759.1	3105899		HH306_RS23585		P	1	NC_002516.2_BF_2556368_2556867
Flank	10	11	2688360	ISPa11_IS110_IS1111	NC_002516.2	NC_002516.2	99600	500	F	E	R	5382021	5382520	1	NZ_CP052759.1	5794259	HH306_RS27345		HH306_RS27350	W	1	NC_002516.2_ER_5382021_5382520
Flank	11	10	1	ISPa11_IS110_IS1111	NC_002516.2	NC_002516.2	99800	500	F	B	R	5383893	5384392	1	NZ_CP052759.1	5794260	HH306_RS27345		HH306_RS27350	W	1	NC_002516.2_BR_5383893_5384392
Flank	12			ISPa11_IS110_IS1111	NC_002516.2	NC_002516.2	96806	499	F	B	F	3843371	3843870	0	NZ_CP052759.1	1725757				P	1	NC_002516.2_BR_3843371_3843870
Query:	PAO1	NC_002516.2
Reference:	CDN129	NZ_CP056774.1
IS:	ISPa11_IS110_IS1111
type	id	mate_id	offset_from_previous	is_element	genome	contig_name	%_id	match_len	feat_type	flank_begin_end	orientation	contig_flank_begin_base	contig_flank_end_base	is_annotated	reference	nearest_base	after_gene	in_gene	before_gene	match_quality	contig_count	contig_pos
Flank	1		3043023	ISPa11_IS110_IS1111	NC_002516.2	NC_002516.2	98698	461	F	E	R	3042975	3043474	1	NZ_CP056774.1	3043023		HWH78_RS25995		P	1	NC_002516.2_ER_3042975_3043474
Flank	2		1479	ISPa11_IS110_IS1111	NC_002516.2	NC_002516.2	99747	396	F	B	R	3044847	3045346	1	NZ_CP056774.1	3044502		HWH78_RS25995		P	1	NC_002516.2_BR_3044847_3045346
Flank	3		881317	ISPa11_IS110_IS1111	NC_002516.2	NC_002516.2	98073	467	F	E	R	3841499	3841998	1	NZ_CP056774.1	3925819		HWH78_RS25995		P	1	NC_002516.2_ER_3841499_3841998
Flank	4	5	638158	ISPa11_IS110_IS1111	NC_002516.2	NC_002516.2	98600	500	F	B	F	4473043	4473542	1	NZ_CP056774.1	4563977		HWH78_RS25995		W	1	NC_002516.2_BF_4473043_4473542
Flank	5	4	1	ISPa11_IS110_IS1111	NC_002516.2	NC_002516.2	98400	500	F	E	F	4474915	4475414	1	NZ_CP056774.1	4563978		HWH78_RS25995		W	1	NC_002516.2_EF_4474915_4475414
Flank	6		540685	ISPa11_IS110_IS1111	NC_002516.2	NC_002516.2	99000	500	F	E	F	499329	499828	1	NZ_CP056774.1	5104663		HWH78_RS25995		W	1	NC_002516.2_ER_499329_499828
Flank	7		81	ISPa11_IS110_IS1111	NC_002516.2	NC_002516.2	97921	478	F	B	F	501201	501700	1	NZ_CP056774.1	5104744		HWH78_RS25995		P	1	NC_002516.2_BR_501201_501700
Flank	8	9	1549114	ISPa11_IS110_IS1111	NC_002516.2	NC_002516.2	99800	500	F	B	F	5383893	5384392	1	NZ_CP056774.1	6653858		HWH78_RS00005		W	1	NC_002516.2_BR_5383893_5384392
Flank	9	8	1	ISPa11_IS110_IS1111	NC_002516.2	NC_002516.2	99600	500	F	E	F	5382021	5382520	1	NZ_CP056774.1	6653859		HWH78_RS00005		W	1	NC_002516.2_ER_5382021_5382520
Flank	10			ISPa11_IS110_IS1111	NC_002516.2	NC_002516.2	94212	490	F	B	F	2556368	2556867	0	NZ_CP056774.1	2473488				P	1	NC_002516.2_BF_2556368_2556867
Flank	11			ISPa11_IS110_IS1111	NC_002516.2	NC_002516.2	94340	264	F	E	F	2558240	2558739	0	NZ_CP056774.1	2473357				P	1	NC_002516.2_EF_2558240_2558739
Flank	12			ISPa11_IS110_IS1111	NC_002516.2	NC_002516.2	93491	169	F	B	R	3843371	3843870	0	NZ_CP056774.1	3925651				P	1	NC_002516.2_BR_3843371_3843870
IS	13			ISPa11_IS110_IS1111	NZ_CP056774.1		68132	270	EMBED_TRUNC	X	R	3154479	3154748	0
IS	14			ISPa11_IS110_IS1111	NZ_CP056774.1		68132	270	EMBED_TRUNC	X	R	3388675	3388944	0
Query:	PAO1	NC_002516.2
Reference:	PA_154197	NZ_CP014866.1
IS:	ISPa11_IS110_IS1111
type	id	mate_id	offset_from_previous	is_element	genome	contig_name	%_id	match_len	feat_type	flank_begin_end	orientation	contig_flank_begin_base	contig_flank_end_base	is_annotated	reference	nearest_base	after_gene	in_gene	before_gene	match_quality	contig_count	contig_pos
Flank	1		487917	ISPa11_IS110_IS1111	NC_002516.2	NC_002516.2	97912	477	F	E	R	499329	499828	1	NZ_CP014866.1	487917		AXW93_RS21845		P	1	NC_002516.2_ER_499329_499828
Flank	2	3	571392	ISPa11_IS110_IS1111	NC_002516.2	NC_002516.2	98600	500	F	E	R	4474915	4475414	1	NZ_CP014866.1	1059309		AXW93_RS21845		W	1	NC_002516.2_EF_4474915_4475414
Flank	3	2	1	ISPa11_IS110_IS1111	NC_002516.2	NC_002516.2	99800	500	F	B	R	4473043	4473542	1	NZ_CP014866.1	1059310		AXW93_RS21845		W	1	NC_002516.2_BF_4473043_4473542
Flank	4		590357	ISPa11_IS110_IS1111	NC_002516.2	NC_002516.2	97436	39	F	E	R	2558240	2558739	1	NZ_CP014866.1	1649667		AXW93_RS21845		P	1	NC_002516.2_EF_2558240_2558739
Flank	5		15566	ISPa11_IS110_IS1111	NC_002516.2	NC_002516.2	97436	39	F	B	R	501201	501700	1	NZ_CP014866.1	1665233		AXW93_RS21845		P	1	NC_002516.2_BR_501201_501700
Flank	6		14800	ISPa11_IS110_IS1111	NC_002516.2	NC_002516.2	97222	467	F	E	F	3841499	3841998	1	NZ_CP014866.1	1680033		AXW93_RS21845		P	1	NC_002516.2_ER_3841499_3841998
Flank	7		826115	ISPa11_IS110_IS1111	NC_002516.2	NC_002516.2	98990	396	F	B	F	3044847	3045346	1	NZ_CP014866.1	2506148		AXW93_RS21845		P	1	NC_002516.2_BR_3044847_3045346
Flank	8		1479	ISPa11_IS110_IS1111	NC_002516.2	NC_002516.2	99132	461	F	E	F	3042975	3043474	1	NZ_CP014866.1	2507627		AXW93_RS21845		P	1	NC_002516.2_ER_3042975_3043474
Flank	9	10	3046988	ISPa11_IS110_IS1111	NC_002516.2	NC_002516.2	99800	500	F	E	R	5382021	5382520	1	NZ_CP014866.1	5554615		AXW93_RS00005		W	1	NC_002516.2_ER_5382021_5382520
Flank	10	9	1	ISPa11_IS110_IS1111	NC_002516.2	NC_002516.2	99800	500	F	B	R	5383893	5384392	1	NZ_CP014866.1	5554616		AXW93_RS00005		W	1	NC_002516.2_BR_5383893_5384392
Flank	11			ISPa11_IS110_IS1111	NC_002516.2	NC_002516.2	93214	489	F	B	R	2556368	2556867	0	NZ_CP014866.1	3071771				P	1	NC_002516.2_BF_2556368_2556867
Flank	12			ISPa11_IS110_IS1111	NC_002516.2	NC_002516.2	92941	169	F	B	F	3843371	3843870	0	NZ_CP014866.1	1680202				P	1	NC_002516.2_BR_3843371_3843870
Query:	PAO1	NC_002516.2
Reference:	VRFPA04	NZ_CP008739.1
IS:	ISPa11_IS110_IS1111
type	id	mate_id	offset_from_previous	is_element	genome	contig_name	%_id	match_len	feat_type	flank_begin_end	orientation	contig_flank_begin_base	contig_flank_end_base	is_annotated	reference	nearest_base	after_gene	in_gene	before_gene	match_quality	contig_count	contig_pos
Flank	1	2	789277	ISPa11_IS110_IS1111	NC_002516.2	NC_002516.2	100000	500	F	B	F	5383893	5384392	1	NZ_CP008739.1	789277		P797_RS28315		W	1	NC_002516.2_BR_5383893_5384392
Flank	2	1	1	ISPa11_IS110_IS1111	NC_002516.2	NC_002516.2	99200	500	F	E	F	5382021	5382520	1	NZ_CP008739.1	789278		P797_RS28315		W	1	NC_002516.2_ER_5382021_5382520
Flank	3		3448375	ISPa11_IS110_IS1111	NC_002516.2	NC_002516.2	98737	396	F	B	R	3044847	3045346	1	NZ_CP008739.1	4237653		P797_RS28315		P	1	NC_002516.2_BR_3044847_3045346
Flank	4		797018	ISPa11_IS110_IS1111	NC_002516.2	NC_002516.2	97436	39	F	B	F	501201	501700	1	NZ_CP008739.1	5034671		P797_RS28315		P	1	NC_002516.2_BR_501201_501700
Flank	5		625862	ISPa11_IS110_IS1111	NC_002516.2	NC_002516.2	98800	500	F	B	F	4473043	4473542	1	NZ_CP008739.1	5660533		P797_RS28315		W	1	NC_002516.2_BF_4473043_4473542
Flank	6		18	ISPa11_IS110_IS1111	NC_002516.2	NC_002516.2	97600	500	F	E	F	4474915	4475414	1	NZ_CP008739.1	5660551		P797_RS28315		W	1	NC_002516.2_EF_4474915_4475414
Flank	7		542896	ISPa11_IS110_IS1111	NC_002516.2	NC_002516.2	98403	500	F	E	F	499329	499828	1	NZ_CP008739.1	6203447		P797_RS31120		W	1	NC_002516.2_ER_499329_499828
Flank	8			ISPa11_IS110_IS1111	NC_002516.2	NC_002516.2	89655	58	F	B	F	2556368	2556867	0	NZ_CP008739.1	3732456				P	1	NC_002516.2_BF_2556368_2556867
Flank	9			ISPa11_IS110_IS1111	NC_002516.2	NC_002516.2	81818	264	F	E	F	2558240	2558739	0	NZ_CP008739.1	3732457				P	1	NC_002516.2_EF_2558240_2558739
Flank	10			ISPa11_IS110_IS1111	NC_002516.2	NC_002516.2			F	E		3042975	3043474	0							1	NC_002516.2_ER_3042975_3043474
Flank	11			ISPa11_IS110_IS1111	NC_002516.2	NC_002516.2	90588	169	F	B	R	3843371	3843870	0	NZ_CP008739.1	5019702				P	1	NC_002516.2_BR_3843371_3843870
Flank	12			ISPa11_IS110_IS1111	NC_002516.2	NC_002516.2	92857	153	F	E	R	3841499	3841998	0	NZ_CP008739.1	5019802				P	1	NC_002516.2_ER_3841499_3841998
Query:	PAO1	NC_002516.2
Reference:	AR_0446	NZ_CP029660.1
IS:	ISPa11_IS110_IS1111
type	id	mate_id	offset_from_previous	is_element	genome	contig_name	%_id	match_len	feat_type	flank_begin_end	orientation	contig_flank_begin_base	contig_flank_end_base	is_annotated	reference	nearest_base	after_gene	in_gene	before_gene	match_quality	contig_count	contig_pos
Flank	1		1233710	ISPa11_IS110_IS1111	NC_002516.2	NC_002516.2	97222	396	F	B	F	3044847	3045346	1	NZ_CP029660.1	1233710		CSC33_RS30505		P	1	NC_002516.2_BR_3044847_3045346
Flank	2		1494	ISPa11_IS110_IS1111	NC_002516.2	NC_002516.2	98438	448	F	E	F	3042975	3043474	1	NZ_CP029660.1	1235204		CSC33_RS30505		P	1	NC_002516.2_ER_3042975_3043474
Flank	3		506634	ISPa11_IS110_IS1111	NC_002516.2	NC_002516.2	97012	500	F	B	R	2556368	2556867	1	NZ_CP029660.1	1741838		CSC33_RS30505		W	1	NC_002516.2_BF_2556368_2556867
Flank	4		2478425	ISPa11_IS110_IS1111	NC_002516.2	NC_002516.2	97000	500	F	B	R	5383893	5384392	1	NZ_CP029660.1	4220263		CSC33_RS30505		W	1	NC_002516.2_BR_5383893_5384392
Flank	5		1425068	ISPa11_IS110_IS1111	NC_002516.2	NC_002516.2	98200	500	F	E	R	499329	499828	1	NZ_CP029660.1	5645331		CSC33_RS30505		W	1	NC_002516.2_ER_499329_499828
Flank	6		102	ISPa11_IS110_IS1111	NC_002516.2	NC_002516.2	97024	500	F	B	R	501201	501700	1	NZ_CP029660.1	5645433		CSC33_RS30505		W	1	NC_002516.2_BR_501201_501700
Flank	7		525416	ISPa11_IS110_IS1111	NC_002516.2	NC_002516.2	98400	500	F	E	R	4474915	4475414	1	NZ_CP029660.1	6170849		CSC33_RS30505		W	1	NC_002516.2_EF_4474915_4475414
Flank	8		93	ISPa11_IS110_IS1111	NC_002516.2	NC_002516.2	98600	500	F	B	R	4473043	4473542	1	NZ_CP029660.1	6170942		CSC33_RS30505		W	1	NC_002516.2_BF_4473043_4473542
Flank	9			ISPa11_IS110_IS1111	NC_002516.2	NC_002516.2	90561	388	F	E	R	2558240	2558739	0	NZ_CP029660.1	1741970				P	1	NC_002516.2_EF_2558240_2558739
Flank	10			ISPa11_IS110_IS1111	NC_002516.2	NC_002516.2	84024	154	F	B	F	3843371	3843870	0	NZ_CP029660.1	406044				P	1	NC_002516.2_BR_3843371_3843870
Flank	11			ISPa11_IS110_IS1111	NC_002516.2	NC_002516.2	76800	231	F	E	R	3841499	3841998	0	NZ_CP029660.1	3671106				P	1	NC_002516.2_ER_3841499_3841998
Flank	12			ISPa11_IS110_IS1111	NC_002516.2	NC_002516.2	95400	500	F	E	R	5382021	5382520	0	NZ_CP029660.1	4219253				P	1	NC_002516.2_ER_5382021_5382520
IS	13			ISPa11_IS110_IS1111	NZ_CP029660.1		76238	101	EMBED_TRUNC	X	F	1339737	1339837	0
Query:	PAO1	NC_002516.2
Reference:	CMC-115	NZ_CP046602.1
IS:	ISPa11_IS110_IS1111
type	id	mate_id	offset_from_previous	is_element	genome	contig_name	%_id	match_len	feat_type	flank_begin_end	orientation	contig_flank_begin_base	contig_flank_end_base	is_annotated	reference	nearest_base	after_gene	in_gene	before_gene	match_quality	contig_count	contig_pos
Flank	1		509235	ISPa11_IS110_IS1111	NC_002516.2	NC_002516.2	97619	83	F	E	R	499329	499828	1	NZ_CP046602.1	509235		GO602_RS22200		P	1	NC_002516.2_ER_499329_499828
Flank	2		515	ISPa11_IS110_IS1111	NC_002516.2	NC_002516.2	99000	500	F	B	R	501201	501700	1	NZ_CP046602.1	509750		GO602_RS22200		W	1	NC_002516.2_BR_501201_501700
Flank	3		2587793	ISPa11_IS110_IS1111	NC_002516.2	NC_002516.2	97600	500	F	B	R	3044847	3045346	1	NZ_CP046602.1	3097543		GO602_RS22200		W	1	NC_002516.2_BR_3044847_3045346
Flank	4		803769	ISPa11_IS110_IS1111	NC_002516.2	NC_002516.2	98200	499	F	E	R	3841499	3841998	1	NZ_CP046602.1	3901312		GO602_RS22200		W	1	NC_002516.2_ER_3841499_3841998
Flank	5		655148	ISPa11_IS110_IS1111	NC_002516.2	NC_002516.2	99600	500	F	B	F	4473043	4473542	1	NZ_CP046602.1	4556460		GO602_RS22200		W	1	NC_002516.2_BF_4473043_4473542
Flank	6	7	950085	ISPa11_IS110_IS1111	NC_002516.2	NC_002516.2	99200	500	F	E	R	5382021	5382520	1	NZ_CP046602.1	5506545		GO602_RS27870		W	1	NC_002516.2_ER_5382021_5382520
Flank	7	6	1	ISPa11_IS110_IS1111	NC_002516.2	NC_002516.2	99200	500	F	B	R	5383893	5384392	1	NZ_CP046602.1	5506546		GO602_RS27870		W	1	NC_002516.2_BR_5383893_5384392
Flank	8			ISPa11_IS110_IS1111	NC_002516.2	NC_002516.2	90909	98	F	B	F	2556368	2556867	0	NZ_CP046602.1	2585536				P	1	NC_002516.2_BF_2556368_2556867
Flank	9			ISPa11_IS110_IS1111	NC_002516.2	NC_002516.2	73805	452	F	E	R	2558240	2558739	0	NZ_CP046602.1	2276245				P	1	NC_002516.2_EF_2558240_2558739
Flank	10			ISPa11_IS110_IS1111	NC_002516.2	NC_002516.2	96000	500	F	E	R	3042975	3043474	0	NZ_CP046602.1	3097542				P	1	NC_002516.2_ER_3042975_3043474
Flank	11			ISPa11_IS110_IS1111	NC_002516.2	NC_002516.2	95800	499	F	B	R	3843371	3843870	0	NZ_CP046602.1	3901213				P	1	NC_002516.2_BR_3843371_3843870
Flank	12			ISPa11_IS110_IS1111	NC_002516.2	NC_002516.2	95800	500	F	E	F	4474915	4475414	0	NZ_CP046602.1	4556461				P	1	NC_002516.2_EF_4474915_4475414
Query:	PAO1	NC_002516.2
Reference:	AR441	ASM307369v1
IS:	ISPa11_IS110_IS1111
type	id	mate_id	offset_from_previous	is_element	genome	contig_name	%_id	match_len	feat_type	flank_begin_end	orientation	contig_flank_begin_base	contig_flank_end_base	is_annotated	reference	nearest_base	after_gene	in_gene	before_gene	match_quality	contig_count	contig_pos
Flank	1			ISPa11_IS110_IS1111	NC_002516.2	NC_002516.2	79592	93	F	B	R	501201	501700	0	NZ_CP029093.1	2782874				P	1	NC_002516.2_BR_501201_501700
Flank	2			ISPa11_IS110_IS1111	NC_002516.2	NC_002516.2	95800	500	F	E	R	499329	499828	0	NZ_CP029093.1	528860				P	1	NC_002516.2_ER_499329_499828
Flank	3			ISPa11_IS110_IS1111	NC_002516.2	NC_002516.2	77311	104	F	B	R	2556368	2556867	0	NZ_CP029093.1	2989325				P	1	NC_002516.2_BF_2556368_2556867
Flank	4			ISPa11_IS110_IS1111	NC_002516.2	NC_002516.2	84416	76	F	E	F	2558240	2558739	0	NZ_CP029093.1	3422605				P	1	NC_002516.2_EF_2558240_2558739
Flank	5			ISPa11_IS110_IS1111	NC_002516.2	NC_002516.2	95000	499	F	B	R	3044847	3045346	0	NZ_CP029093.1	4059963				P	1	NC_002516.2_BR_3044847_3045346
Flank	6			ISPa11_IS110_IS1111	NC_002516.2	NC_002516.2	95000	500	F	E	R	3042975	3043474	0	NZ_CP029093.1	4059962				P	1	NC_002516.2_ER_3042975_3043474
Flank	7			ISPa11_IS110_IS1111	NC_002516.2	NC_002516.2	85890	148	F	B	F	3843371	3843870	0	NZ_CP029093.1	1662222				P	1	NC_002516.2_BR_3843371_3843870
Flank	8			ISPa11_IS110_IS1111	NC_002516.2	NC_002516.2	89286	83	F	E	F	3841499	3841998	0	NZ_CP029093.1	1662139				P	1	NC_002516.2_ER_3841499_3841998
Flank	9			ISPa11_IS110_IS1111	NC_002516.2	NC_002516.2	90726	496	F	B	R	4473043	4473542	0	NZ_CP029093.1	1034016				P	1	NC_002516.2_BF_4473043_4473542
Flank	10			ISPa11_IS110_IS1111	NC_002516.2	NC_002516.2	83240	175	F	E	R	4474915	4475414	0	NZ_CP029093.1	1033916				P	1	NC_002516.2_EF_4474915_4475414
Flank	11			ISPa11_IS110_IS1111	NC_002516.2	NC_002516.2	92800	500	F	B	R	5383893	5384392	0	NZ_CP029093.1	5691160				P	1	NC_002516.2_BR_5383893_5384392
Flank	12			ISPa11_IS110_IS1111	NC_002516.2	NC_002516.2	90800	498	F	E	R	5382021	5382520	0	NZ_CP029093.1	5691159				P	1	NC_002516.2_ER_5382021_5382520
Query:	W16407	NZ_CP008869.2
Reference:	PAO1	NC_002516.2
IS:	ISPa37_IS30
type	id	mate_id	offset_from_previous	is_element	genome	contig_name	%_id	match_len	feat_type	flank_begin_end	orientation	contig_flank_begin_base	contig_flank_end_base	is_annotated	reference	nearest_base	after_gene	in_gene	before_gene	match_quality	contig_count	contig_pos
Flank	1	2	288642	ISPa37_IS30	NZ_CP008869.2	NZ_CP008869.2	99800	500	F	B	R	283962	284461	1	NC_002516.2	288642		PA0257		W	1	NZ_CP008869.2_BR_283962_284461
Flank	2	1	1	ISPa37_IS30	NZ_CP008869.2	NZ_CP008869.2	99202	500	F	E	R	282009	282508	1	NC_002516.2	288643		PA0257		W	1	NZ_CP008869.2_ER_282009_282508
Query:	LYT4	ASM1297170v1
Reference:	PAO1	NC_002516.2
IS:	IS222_IS3_IS3
type	id	mate_id	offset_from_previous	is_element	genome	contig_name	%_id	match_len	feat_type	flank_begin_end	orientation	contig_flank_begin_base	contig_flank_end_base	is_annotated	reference	nearest_base	after_gene	in_gene	before_gene	match_quality	contig_count	contig_pos
Flank	1	2	1061198	IS222_IS3_IS3	ASM1297170v1	ASM1297170v1	97400	500	F	E	R	4592245	4592744	1	NC_002516.2	1061198	PA0976		PA0978	W	1	NZ_CP052759.1_EF_4592245_4592744
Flank	2	1	1237	IS222_IS3_IS3	ASM1297170v1	ASM1297170v1	98938	470	F	B	R	4590509	4591008	1	NC_002516.2	1062435	PA0979		PA0981	P	1	NZ_CP052759.1_BF_4590509_4591008
Flank	3	4	1163874	IS222_IS3_IS3	ASM1297170v1	ASM1297170v1	98000	492	F	B	R	3427144	3427643	1	NC_002516.2	2226309	PA2035		PA2036	W	1	NZ_CP052759.1_BF_3427144_3427643
Flank	4	3	2	IS222_IS3_IS3	ASM1297170v1	ASM1297170v1	98200	500	F	E	R	3428880	3429379	1	NC_002516.2	2226311	PA2035		PA2036	W	1	NZ_CP052759.1_EF_3428880_3429379
Flank	5			IS222_IS3_IS3	ASM1297170v1	ASM1297170v1	88976	127	F	B	R	3536571	3537070	0	NC_002516.2	2115819				P	1	NZ_CP052759.1_BF_3536571_3537070
Flank	6			IS222_IS3_IS3	ASM1297170v1	ASM1297170v1			F	E		3538307	3538806	0							1	NZ_CP052759.1_EF_3538307_3538806
IS	7			IS222_IS3_IS3	NC_002516.2		99919	1236	EMBED	X	R	1061199	1062434	0
IS	8			IS222_IS3_IS3	NC_002516.2		97492	1236	EMBED	X	F	2118520	2119755	0
Query:	CDN129	NZ_CP056774.1
Reference:	PAO1	NC_002516.2
IS:	ISAzvi4_IS110_IS1111
type	id	mate_id	offset_from_previous	is_element	genome	contig_name	%_id	match_len	feat_type	flank_begin_end	orientation	contig_flank_begin_base	contig_flank_end_base	is_annotated	reference	nearest_base	after_gene	in_gene	before_gene	match_quality	contig_count	contig_pos
Query:	CMC-115	NZ_CP046602.1
Reference:	PAO1	NC_002516.2
IS:	ISPa57_IS3_IS3
type	id	mate_id	offset_from_previous	is_element	genome	contig_name	%_id	match_len	feat_type	flank_begin_end	orientation	contig_flank_begin_base	contig_flank_end_base	is_annotated	reference	nearest_base	after_gene	in_gene	before_gene	match_quality	contig_count	contig_pos
Flank	1		403036	ISPa57_IS3_IS3	NZ_CP046602.1	NZ_CP046602.1	100000	500	F	E	R	410418	410917	1	NC_002516.2	403036	PA0359		PA0360	W	1	NZ_CP046602.1_ER_410418_410917
Flank	2		4348565	ISPa57_IS3_IS3	NZ_CP046602.1	NZ_CP046602.1	98594	498	F	E	R	4870277	4870776	1	NC_002516.2	4751601	PA4234		PA4235	W	1	NZ_CP046602.1_ER_4870277_4870776
Flank	3			ISPa57_IS3_IS3	NZ_CP046602.1	NZ_CP046602.1	87921	481	F	B	R	412241	412740	0	NC_002516.2	403034				P	1	NZ_CP046602.1_BR_412241_412740
Flank	4			ISPa57_IS3_IS3	NZ_CP046602.1	NZ_CP046602.1	96800	500	F	B	R	2030616	2031115	0	NC_002516.2	1994616				P	1	NZ_CP046602.1_BR_2030616_2031115
Flank	5			ISPa57_IS3_IS3	NZ_CP046602.1	NZ_CP046602.1	96800	500	F	E	R	2028793	2029292	0	NC_002516.2	1994618				P	1	NZ_CP046602.1_ER_2028793_2029292
Flank	6			ISPa57_IS3_IS3	NZ_CP046602.1	NZ_CP046602.1			F	B		2675557	2676056	0							1	NZ_CP046602.1_BR_2675557_2676056
Flank	7			ISPa57_IS3_IS3	NZ_CP046602.1	NZ_CP046602.1			F	E		2673734	2674233	0							1	NZ_CP046602.1_ER_2673734_2674233
Flank	8			ISPa57_IS3_IS3	NZ_CP046602.1	NZ_CP046602.1	96794	498	F	B	R	4872100	4872599	0	NC_002516.2	4751603				P	1	NZ_CP046602.1_BR_4872100_4872599
Flank	9			ISPa57_IS3_IS3	NZ_CP046602.1	NZ_CP046602.1	88294	496	F	B	F	4953376	4953875	0	NC_002516.2	4833369				P	1	NZ_CP046602.1_BF_4953376_4953875
Flank	10			ISPa57_IS3_IS3	NZ_CP046602.1	NZ_CP046602.1	96200	500	F	E	F	4955199	4955698	0	NC_002516.2	4833367				P	1	NZ_CP046602.1_EF_4955199_4955698
IS	11			ISPa57_IS3_IS3	NC_002516.2		96959	1176	EMBED_TRUNC	X	R	288335	289510	0

## Sheet: IScompare
Shadings:	FP	TP	TP*
Query:	PAO1	NC_002516.2
Reference:	PAO1161	NZ_CP032126.1
IS:	ISPa11_IS110_IS1111
	ISID	ISstart	ISend	Query.ID1	Start1	End1	Query.ID2	Start2	End2	REF.ID1	REF.Start1	REF.End1	REF.ID2	REF.Start2	REF.End2	Description	Observations	IS_Match_Type	QUERY_Flank1.locus_tag	QUERY_Flank1.Product	QUERY_Flank2.locus_tag	QUERY_Flank2.Product	REF_Flank1.locus_tag	REF.Product_Flank1	REF_Flank2.locus_tag	REF.Product_Flank2	Scaffold_Size
Query:	PAO1	NC_002516.2
Reference:	W16407	NZ_CP008869.2
IS:	ISPa11_IS110_IS1111
	ISID	ISstart	ISend	Query.ID1	Start1	End1	Query.ID2	Start2	End2	REF.ID1	REF.Start1	REF.End1	REF.ID2	REF.Start2	REF.End2	Description	Observations	IS_Match_Type	QUERY_Flank1.locus_tag	QUERY_Flank1.Product	QUERY_Flank2.locus_tag	QUERY_Flank2.Product	REF_Flank1.locus_tag	REF.Product_Flank1	REF_Flank2.locus_tag	REF.Product_Flank2	Scaffold_Size
0	ISPa11_IS1111_IS110	499829.0	501200.0	NZ_CP008869.2	494641.0	495141.0		495060.0	495538.0	NC_002516.2	499328.0	499828.0		501201.0	501701.0	IS only present in ref Strain.	1. DLIS		HV98_RS02335	Zn-dependent hydrolase	-	-	PA0444	allantoate amidohydrolase	PA0446	hypothetical protein	6264404.0
1	ISPa11_IS1111_IS110	3043475.0	3044846.0	NZ_CP008869.2	2733703.0				2734704.0	NC_002516.2	3042974.0	3043474.0		3044847.0	3045347.0	IS only present in ref Strain.	1. DLIS	Complete IS hit.	HV98_RS13360	NAD(P)/FAD-dependent oxidoreductase	HV98_RS13365	ferric enterobactin esterase PfeE	PA2689	hypothetical protein	PA2691	hypothetical protein	6264404.0
2	ISPa11_IS1111_IS110	3841999.0	3843370.0	NZ_CP008869.2	1753898.0	1754398.0		1753599.0	1754099.0	NC_002516.2	3841498.0	3841998.0		3843371.0	3843871.0	IS only present in ref Strain.	1. DLIS		HV98_RS08575	LysR family transcriptional regulator	-	-	PA3433	transcriptional regulator	PA3435	flavodoxin	6264404.0
3	ISPa11_IS1111_IS110	4473543.0	4474914.0	NZ_CP008869.2	1082284.0				1083285.0	NC_002516.2	4473042.0	4473542.0		4474915.0	4475415.0	IS only present in ref Strain.	1. DLIS	Complete IS hit.	HV98_RS05330	alpha/beta hydrolase	HV98_RS05335	lytic murein transglycosylase	PA3992	hypothetical protein	PA3994	epoxide hydrolase	6264404.0
4	ISPa11_IS1111_IS110	5382521.0	5383892.0	NZ_CP008869.2	5843643.0				5844644.0	NC_002516.2	5382020.0	5382520.0		5383893.0	5384393.0	IS only present in ref Strain.	1. DLIS	Complete IS hit.	HV98_RS27830	glycine cleavage system protein H	HV98_RS27835	GrpB family protein	PA4796	hypothetical protein	PA4798	hypothetical protein	6264404.0
5	ISPa11_IS1111_IS110	2556868.0	2558239.0	NZ_CP008869.2	3234367.0	3234868.0				NC_002516.2	2556367.0	2556867.0		2558240.0	2558740.0	IS only present in ref Strain.	6. Discarded for analysis. There were multiple blastn hits, and left and right pairs could not be determined.		HV98_RS15365	cupin domain-containing protein	-	-	PA2318	hypothetical protein	-	Intergenic/Pseudo/Repeaed Region	6264404.0
Query:	PAO1	NC_002516.2
Reference:	LYT4	ASM1297170v1
IS:	ISPa11_IS110_IS1111
	ISID	ISstart	ISend	Query.ID1	Start1	End1	Query.ID2	Start2	End2	REF.ID1	REF.Start1	REF.End1	REF.ID2	REF.Start2	REF.End2	Description	Observations	IS_Match_Type	QUERY_Flank1.locus_tag	QUERY_Flank1.Product	QUERY_Flank2.locus_tag	QUERY_Flank2.Product	REF_Flank1.locus_tag	REF.Product_Flank1	REF_Flank2.locus_tag	REF.Product_Flank2	Scaffold_Size
0	ISPa11_IS1111_IS110	499829.0	501200.0	NZ_CP052759.1	502643.0	503143.0		503061.0	503540.0	NC_002516.2	499328.0	499828.0		501201.0	501701.0	IS only present in ref Strain.	1. DLIS		HH306_RS02255	Zn-dependent hydrolase	-	-	PA0444	allantoate amidohydrolase	PA0446	hypothetical protein	6264404.0
1	ISPa11_IS1111_IS110	3043475.0	3044846.0	NZ_CP052759.1	2587892.0				2588893.0	NC_002516.2	3042974.0	3043474.0		3044847.0	3045347.0	IS only present in ref Strain.	1. DLIS	Complete IS hit.	HH306_RS12520	NAD(P)/FAD-dependent oxidoreductase	HH306_RS12525	ferric enterobactin esterase PfeE	PA2689	hypothetical protein	PA2691	hypothetical protein	6264404.0
2	ISPa11_IS1111_IS110	3841999.0	3843370.0	NZ_CP052759.1	1725657.0	1726157.0		1725258.0	1725757.0	NC_002516.2	3841498.0	3841998.0		3843371.0	3843871.0	IS only present in ref Strain.	1. DLIS		HH306_RS08165	LysR family transcriptional regulator	-	-	PA3433	transcriptional regulator	PA3435	flavodoxin	6264404.0
3	ISPa11_IS1111_IS110	4473543.0	4474914.0	NZ_CP052759.1	1065266.0				1066267.0	NC_002516.2	4473042.0	4473542.0		4474915.0	4475415.0	IS only present in ref Strain.	1. DLIS	Complete IS hit.	HH306_RS05060	alpha/beta hydrolase	HH306_RS05065	lytic murein transglycosylase	PA3992	hypothetical protein	PA3994	epoxide hydrolase	6264404.0
4	ISPa11_IS1111_IS110	5382521.0	5383892.0	NZ_CP052759.1	5793759.0				5794760.0	NC_002516.2	5382020.0	5382520.0		5383893.0	5384393.0	IS only present in ref Strain.	1. DLIS	Complete IS hit.	HH306_RS27345	glycine cleavage system protein H	HH306_RS27350	GrpB family protein	PA4796	hypothetical protein	PA4798	hypothetical protein	6264404.0
5	ISPa11_IS110_IS1111	2556868.0	2558239.0	NZ_CP052759.1	3105501.0	3105904.0		3105899.0	3106333.0	NC_002516.2	2556367.0	2556867.0		2558240.0	2558740.0	IS only present in ref Strain.	7. Discarded for analysis, blastn hits with low query coverage.		-	Intergenic/Pseudo/Repeaed Region	-	-	PA2318	hypothetical protein	-	Intergenic/Pseudo/Repeaed Region	6264404.0
Query:	PAO1	NC_002516.2
Reference:	CDN129	NZ_CP056774.1
IS:	ISPa11_IS110_IS1111
	ISID	ISstart	ISend	Query.ID1	Start1	End1	Query.ID2	Start2	End2	REF.ID1	REF.Start1	REF.End1	REF.ID2	REF.Start2	REF.End2	Description	Observations	IS_Match_Type	QUERY_Flank1.locus_tag	QUERY_Flank1.Product	QUERY_Flank2.locus_tag	QUERY_Flank2.Product	REF_Flank1.locus_tag	REF.Product_Flank1	REF_Flank2.locus_tag	REF.Product_Flank2	Scaffold_Size
0	ISPa11_IS1111_IS110	499829.0	501200.0	NZ_CP056774.1	5104663.0	5105163.0		5104266.0	5104744.0	NC_002516.2	499328.0	499828.0		501201.0	501701.0	IS only present in ref Strain.	1. DLIS		HWH78_RS23775	Zn-dependent hydrolase	-	-	PA0444	allantoate amidohydrolase	PA0446	hypothetical protein	6264404.0
1	ISPa11_IS1111_IS110	3841999.0	3843370.0	NZ_CP056774.1	3925352.0	3925816.0		3925598.0	3926050.0	NC_002516.2	3841498.0	3841998.0		3843371.0	3843871.0	IS only present in ref Strain.	1. DLIS		HWH78_RS18230	LysR family transcriptional regulator	-	-	PA3433	transcriptional regulator	PA3435	flavodoxin	6264404.0
2	ISPa11_IS1111_IS110	4473543.0	4474914.0	NZ_CP056774.1	4563478.0				4564478.0	NC_002516.2	4473042.0	4473542.0		4474915.0	4475415.0	IS only present in ref Strain.	1. DLIS	Complete IS hit.	HWH78_RS21140	lytic murein transglycosylase	HWH78_RS21145	alpha/beta hydrolase	PA3992	hypothetical protein	PA3994	epoxide hydrolase	6264404.0
3	ISPa11_IS1111_IS110	5382521.0	5383892.0	NZ_CP056774.1	6653358.0				6654359.0	NC_002516.2	5382020.0	5382520.0		5383893.0	5384393.0	IS only present in ref Strain.	1. DLIS	Complete IS hit.	HWH78_RS30825	GrpB family protein	HWH78_RS30830	glycine cleavage system protein H	PA4796	hypothetical protein	PA4798	hypothetical protein	6264404.0
4	ISPa11_IS1111_IS110	2556868.0	2558239.0	NZ_CP056774.1	2472998.0	2473488.0				NC_002516.2	2556367.0	2556867.0		2558240.0	2558740.0	IS only present in ref Strain.	6. Discarded for analysis. There were multiple blastn hits, and left and right pairs could not be determined.		HWH78_RS11655	cupin domain-containing protein	-	-	PA2318	hypothetical protein	-	Intergenic/Pseudo/Repeaed Region	6264404.0
5	ISPa11_IS110_IS1111	3043475.0	3044846.0	NZ_CP056774.1	3044502.0	3044898.0		3042562.0	3043023.0	NC_002516.2	3042974.0	3043474.0		3044847.0	3045347.0	IS only present in ref Strain.	6. Discarded for analysis. There were multiple blastn hits, and left and right pairs could not be determined.		HWH78_RS13945	NAD(P)/FAD-dependent oxidoreductase	-	-	PA2689	hypothetical protein	PA2691	hypothetical protein	6264404.0
Query:	PAO1	NC_002516.2
Reference:	PA_154197	NZ_CP014866.1
IS:	ISPa11_IS110_IS1111
	ISID	ISstart	ISend	Query.ID1	Start1	End1	Query.ID2	Start2	End2	REF.ID1	REF.Start1	REF.End1	REF.ID2	REF.Start2	REF.End2	Description	Observations	IS_Match_Type	QUERY_Flank1.locus_tag	QUERY_Flank1.Product	QUERY_Flank2.locus_tag	QUERY_Flank2.Product	REF_Flank1.locus_tag	REF.Product_Flank1	REF_Flank2.locus_tag	REF.Product_Flank2	Scaffold_Size
0	ISPa11_IS1111_IS110	2556868.0	2558239.0	NZ_CP014866.1	3071771.0	3072260.0		3071400.0	3071901.0	NC_002516.2	2556367.0	2556867.0		2558240.0	2558740.0	IS only present in ref Strain.	1. DLIS		AXW93_RS14585	DUF861 domain-containing protein	-	-	PA2318	hypothetical protein	-	Intergenic/Pseudo/Repeaed Region	6264404.0
1	ISPa11_IS1111_IS110	3841999.0	3843370.0	NZ_CP014866.1	1680033.0	1680500.0		1679802.0	1680251.0	NC_002516.2	3841498.0	3841998.0		3843371.0	3843871.0	IS only present in ref Strain.	1. DLIS		AXW93_RS08050	LysR family transcriptional regulator	-	-	PA3433	transcriptional regulator	PA3435	flavodoxin	6264404.0
2	ISPa11_IS1111_IS110	4473543.0	4474914.0	NZ_CP014866.1	1058809.0				1059810.0	NC_002516.2	4473042.0	4473542.0		4474915.0	4475415.0	IS only present in ref Strain.	1. DLIS	Complete IS hit.	AXW93_RS05120	alpha/beta hydrolase	AXW93_RS05125	lytic murein transglycosylase	PA3992	hypothetical protein	PA3994	epoxide hydrolase	6264404.0
3	ISPa11_IS1111_IS110	5382521.0	5383892.0	NZ_CP014866.1	5554115.0				5555116.0	NC_002516.2	5382020.0	5382520.0		5383893.0	5384393.0	IS only present in ref Strain.	1. DLIS	Complete IS hit.	AXW93_RS26425	glycine cleavage system protein H	AXW93_RS26430	GrpB family protein	PA4796	hypothetical protein	PA4798	hypothetical protein	6264404.0
4	ISPa11_IS110_IS1111	499829.0	501200.0	NZ_CP014866.1	487885.0	488253.0		487440.0	487912.0	NC_002516.2	499328.0	499828.0		501201.0	501701.0	IS only present in ref Strain.	6. Discarded for analysis. There were multiple blastn hits, and left and right pairs could not be determined.		AXW93_RS02315	CoA transferase	-	-	PA0444	allantoate amidohydrolase	PA0446	hypothetical protein	6264404.0
5	ISPa11_IS110_IS1111	3043475.0	3044846.0	NZ_CP014866.1	2505752.0	2506148.0		2507627.0	2508088.0	NC_002516.2	3042974.0	3043474.0		3044847.0	3045347.0	IS only present in ref Strain.	6. Discarded for analysis. There were multiple blastn hits, and left and right pairs could not be determined.		AXW93_RS12165	NAD(P)/FAD-dependent oxidoreductase	-	-	PA2689	hypothetical protein	PA2691	hypothetical protein	6264404.0
Query:	PAO1	NC_002516.2
Reference:	VRFPA04	NZ_CP008739.1
IS:	ISPa11_IS110_IS1111
	ISID	ISstart	ISend	Query.ID1	Start1	End1	Query.ID2	Start2	End2	REF.ID1	REF.Start1	REF.End1	REF.ID2	REF.Start2	REF.End2	Description	Observations	IS_Match_Type	QUERY_Flank1.locus_tag	QUERY_Flank1.Product	QUERY_Flank2.locus_tag	QUERY_Flank2.Product	REF_Flank1.locus_tag	REF.Product_Flank1	REF_Flank2.locus_tag	REF.Product_Flank2	Scaffold_Size
0	ISPa11_IS1111_IS110	499829.0	501200.0	NZ_CP008739.1	6203447.0	6203948.0		6203067.0	6203529.0	NC_002516.2	499328.0	499828.0		501201.0	501701.0	IS only present in ref Strain.	1. DLIS		P797_RS28665	Zn-dependent hydrolase	-	-	PA0444	allantoate amidohydrolase	PA0446	hypothetical protein	6264404.0
1	ISPa11_IS1111_IS110	3841999.0	3843370.0	NZ_CP008739.1	5019403.0	5019867.0		5019649.0	5020101.0	NC_002516.2	3841498.0	3841998.0		3843371.0	3843871.0	IS only present in ref Strain.	1. DLIS		P797_RS23015	LysR family transcriptional regulator	-	-	PA3433	transcriptional regulator	PA3435	flavodoxin	6264404.0
2	ISPa11_IS1111_IS110	4473543.0	4474914.0	NZ_CP008739.1	5660033.0				5661051.0	NC_002516.2	4473042.0	4473542.0		4474915.0	4475415.0	IS only present in ref Strain.	1. DLIS	Complete IS hit.	P797_RS26005	lytic murein transglycosylase	P797_RS26010	alpha/beta hydrolase	PA3992	hypothetical protein	PA3994	epoxide hydrolase	6264404.0
3	ISPa11_IS1111_IS110	5382521.0	5383892.0	NZ_CP008739.1	788777.0				789778.0	NC_002516.2	5382020.0	5382520.0		5383893.0	5384393.0	IS only present in ref Strain.	1. DLIS	Complete IS hit.	P797_RS03550	GrpB family protein	P797_RS03555	glycine cleavage system protein H	PA4796	hypothetical protein	PA4798	hypothetical protein	6264404.0
4	ISPa11_IS1111_IS110	2556868.0	2558239.0	NZ_CP008739.1	3732097.0	3732581.0				NC_002516.2	2556367.0	2556867.0		2558240.0	2558740.0	IS only present in ref Strain.	6. Discarded for analysis. There were multiple blastn hits, and left and right pairs could not be determined.		P797_RS17260	cupin domain-containing protein	-	-	PA2318	hypothetical protein	-	Intergenic/Pseudo/Repeaed Region	6264404.0
5	ISPa11_IS110_IS1111	3043475.0	3044846.0	NZ_CP008739.1	4237653.0	4238049.0				NC_002516.2	3042974.0	3043474.0		3044847.0	3045347.0	IS only present in ref Strain.	7. Discarded for analysis, blastn hits with low query coverage.		P797_RS19170	NAD(P)/FAD-dependent oxidoreductase	-	-	PA2689	hypothetical protein	PA2691	hypothetical protein	6264404.0
Query:	PAO1	NC_002516.2
Reference:	AR_0446	NZ_CP029660.1
IS:	ISPa11_IS110_IS1111
	ISID	ISstart	ISend	Query.ID1	Start1	End1	Query.ID2	Start2	End2	REF.ID1	REF.Start1	REF.End1	REF.ID2	REF.Start2	REF.End2	Description	Observations	IS_Match_Type	QUERY_Flank1.locus_tag	QUERY_Flank1.Product	QUERY_Flank2.locus_tag	QUERY_Flank2.Product	REF_Flank1.locus_tag	REF.Product_Flank1	REF_Flank2.locus_tag	REF.Product_Flank2	Scaffold_Size
0	ISPa11_IS1111_IS110	499829.0	501200.0	NZ_CP029660.1	5644831.0	5645331.0		5645433.0	5645937.0	NC_002516.2	499328.0	499828.0		501201.0	501701.0	IS only present in ref Strain.	1. DLIS		CSC33_RS26860	Zn-dependent hydrolase	-	-	PA0444	allantoate amidohydrolase	PA0446	hypothetical protein	6264404.0
1	ISPa11_IS1111_IS110	4473543.0	4474914.0	NZ_CP029660.1	6170942.0	6171442.0		6170349.0	6170849.0	NC_002516.2	4473042.0	4473542.0		4474915.0	4475415.0	IS only present in ref Strain.	1. DLIS		CSC33_RS29485	lytic murein transglycosylase	-	-	PA3992	hypothetical protein	PA3994	epoxide hydrolase	6264404.0
2	ISPa11_IS1111_IS110	5382521.0	5383892.0	NZ_CP029660.1	4218753.0	4219253.0		4220263.0	4220763.0	NC_002516.2	5382020.0	5382520.0		5383893.0	5384393.0	IS only present in ref Strain.	1. DLIS		CSC33_RS20190	glycine cleavage system protein H	-	-	PA4796	hypothetical protein	PA4798	hypothetical protein	6264404.0
3	ISPa11_IS1111_IS110	2556868.0	2558239.0	NZ_CP029660.1	1741838.0	1742340.0				NC_002516.2	2556367.0	2556867.0		2558240.0	2558740.0	IS only present in ref Strain.	6. Discarded for analysis. There were multiple blastn hits, and left and right pairs could not be determined.		CSC33_RS08150	cupin domain-containing protein	-	-	PA2318	hypothetical protein	-	Intergenic/Pseudo/Repeaed Region	6264404.0
4	ISPa11_IS1111_IS110	3841999.0	3843370.0	NZ_CP029660.1	405891.0	406342.0				NC_002516.2	3841498.0	3841998.0		3843371.0	3843871.0	IS only present in ref Strain.	6. Discarded for analysis. There were multiple blastn hits, and left and right pairs could not be determined.		CSC33_RS01845	LysR family transcriptional regulator	-	-	PA3433	transcriptional regulator	PA3435	flavodoxin	6264404.0
5	ISPa11_IS110_IS1111	3043475.0	3044846.0	NZ_CP029660.1	1233314.0	1233710.0		1235204.0	1235652.0	NC_002516.2	3042974.0	3043474.0		3044847.0	3045347.0	IS only present in ref Strain.	7. Discarded for analysis, blastn hits with low query coverage.		CSC33_RS05980	NAD(P)/FAD-dependent oxidoreductase	-	-	PA2689	hypothetical protein	PA2691	hypothetical protein	6264404.0
Query:	PAO1	NC_002516.2
Reference:	CMC-115	NZ_CP046602.1
IS:	ISPa11_IS110_IS1111
	ISID	ISstart	ISend	Query.ID1	Start1	End1	Query.ID2	Start2	End2	REF.ID1	REF.Start1	REF.End1	REF.ID2	REF.Start2	REF.End2	Description	Observations	IS_Match_Type	QUERY_Flank1.locus_tag	QUERY_Flank1.Product	QUERY_Flank2.locus_tag	QUERY_Flank2.Product	REF_Flank1.locus_tag	REF.Product_Flank1	REF_Flank2.locus_tag	REF.Product_Flank2	Scaffold_Size
0	ISPa11_IS1111_IS110	499829.0	501200.0	NZ_CP046602.1	508533.0	509033.0		509750.0	510250.0	NC_002516.2	499328.0	499828.0		501201.0	501701.0	IS only present in ref Strain.	1. DLIS		GO602_RS02295	Zn-dependent hydrolase	-	-	PA0444	allantoate amidohydrolase	PA0446	hypothetical protein	6264404.0
1	ISPa11_IS1111_IS110	3043475.0	3044846.0	NZ_CP046602.1	3097042.0				3098043.0	NC_002516.2	3042974.0	3043474.0		3044847.0	3045347.0	IS only present in ref Strain.	1. DLIS	Complete IS hit.	GO602_RS14120	ferric enterobactin esterase PfeE	GO602_RS14125	NAD(P)/FAD-dependent oxidoreductase	PA2689	hypothetical protein	PA2691	hypothetical protein	6264404.0
2	ISPa11_IS1111_IS110	3841999.0	3843370.0	NZ_CP046602.1	3900813.0	3901312.0		3901213.0	3901712.0	NC_002516.2	3841498.0	3841998.0		3843371.0	3843871.0	IS only present in ref Strain.	1. DLIS		GO602_RS18085	LysR family transcriptional regulator	-	-	PA3433	transcriptional regulator	PA3435	flavodoxin	6264404.0
3	ISPa11_IS1111_IS110	4473543.0	4474914.0	NZ_CP046602.1	4555960.0				4556961.0	NC_002516.2	4473042.0	4473542.0		4474915.0	4475415.0	IS only present in ref Strain.	1. DLIS	Complete IS hit.	GO602_RS21210	lytic murein transglycosylase	GO602_RS21215	alpha/beta hydrolase	PA3992	hypothetical protein	PA3994	epoxide hydrolase	6264404.0
4	ISPa11_IS1111_IS110	5382521.0	5383892.0	NZ_CP046602.1	5506045.0				5507046.0	NC_002516.2	5382020.0	5382520.0		5383893.0	5384393.0	IS only present in ref Strain.	1. DLIS	Complete IS hit.	GO602_RS25725	glycine cleavage system protein H	GO602_RS25730	GrpB family protein	PA4796	hypothetical protein	PA4798	hypothetical protein	6264404.0
5	ISPa11_IS1111_IS110	2556868.0	2558239.0	NZ_CP046602.1	2585142.0	2585584.0				NC_002516.2	2556367.0	2556867.0		2558240.0	2558740.0	IS only present in ref Strain.	6. Discarded for analysis. There were multiple blastn hits, and left and right pairs could not be determined.		GO602_RS12105	DUF861 domain-containing protein	-	-	PA2318	hypothetical protein	-	Intergenic/Pseudo/Repeaed Region	6264404.0
Query:	PAO1	NC_002516.2
Reference:	AR441	ASM307369v1
IS:	ISPa11_IS110_IS1111
	ISID	ISstart	ISend	Query.ID1	Start1	End1	Query.ID2	Start2	End2	REF.ID1	REF.Start1	REF.End1	REF.ID2	REF.Start2	REF.End2	Description	Observations	IS_Match_Type	QUERY_Flank1.locus_tag	QUERY_Flank1.Product	QUERY_Flank2.locus_tag	QUERY_Flank2.Product	REF_Flank1.locus_tag	REF.Product_Flank1	REF_Flank2.locus_tag	REF.Product_Flank2	Scaffold_Size
0	ISPa11_IS1111_IS110	499829.0	501200.0	NZ_CP029093.1	528360.0	528860.0		528779.0	529257.0	NC_002516.2	499328.0	499828.0		501201.0	501701.0	IS only present in ref Strain.	1. DLIS		CSC28_RS03855	Zn-dependent hydrolase	-	-	PA0444	allantoate amidohydrolase	PA0446	hypothetical protein	6264404.0
1	ISPa11_IS1111_IS110	3043475.0	3044846.0	NZ_CP029093.1	4059462.0				4060462.0	NC_002516.2	3042974.0	3043474.0		3044847.0	3045347.0	IS only present in ref Strain.	1. DLIS	Complete IS hit.	CSC28_RS20870	ferric enterobactin esterase PfeE	CSC28_RS20875	NAD(P)/FAD-dependent oxidoreductase	PA2689	hypothetical protein	PA2691	hypothetical protein	6264404.0
2	ISPa11_IS1111_IS110	5382521.0	5383892.0	NZ_CP029093.1	5690661.0				5691660.0	NC_002516.2	5382020.0	5382520.0		5383893.0	5384393.0	IS only present in ref Strain.	1. DLIS	Complete IS hit.	CSC28_RS28615	glycine cleavage system protein H	CSC28_RS28620	GrpB family protein	PA4796	hypothetical protein	PA4798	hypothetical protein	6264404.0
3	ISPa11_IS1111_IS110	4473543.0	4474914.0	NZ_CP029093.1	1034016.0	1034511.0				NC_002516.2	4473042.0	4473542.0		4474915.0	4475415.0	IS only present in ref Strain.	6. Discarded for analysis. There were multiple blastn hits, and left and right pairs could not be determined.		CSC28_RS06370	lytic murein transglycosylase	-	-	PA3992	hypothetical protein	PA3994	epoxide hydrolase	6264404.0
4	ISPa11_IS1111_IS110	2556868.0	2558239.0	NZ_CP029093.1	2989422.0	2989730.0				NC_002516.2	2556367.0	2556867.0		2558240.0	2558740.0	IS only present in ref Strain.	7. Discarded for analysis, blastn hits with low query coverage.		CSC28_RS15685	DUF861 domain-containing protein	-	-	PA2318	hypothetical protein	-	Intergenic/Pseudo/Repeaed Region	6264404.0
5	ISPa11_IS1111_IS110	3841999.0	3843370.0	NZ_CP029093.1	1661843.0	1662214.0				NC_002516.2	3841498.0	3841998.0		3843371.0	3843871.0	IS only present in ref Strain.	7. Discarded for analysis, blastn hits with low query coverage.		CSC28_RS09265	flavodoxin	-	-	PA3433	transcriptional regulator	PA3435	flavodoxin	6264404.0
Query:	W16407	NZ_CP008869.2
Reference:	PAO1	NC_002516.2
IS:	ISPa37_IS30
	ISID	ISstart	ISend	Query.ID1	Start1	End1	Query.ID2	Start2	End2	REF.ID1	REF.Start1	REF.End1	REF.ID2	REF.Start2	REF.End2	Description	Observations	IS_Match_Type	QUERY_Flank1.locus_tag	QUERY_Flank1.Product	QUERY_Flank2.locus_tag	QUERY_Flank2.Product	REF_Flank1.locus_tag	REF.Product_Flank1	REF_Flank2.locus_tag	REF.Product_Flank2	Scaffold_Size
0	ISPa37_IS30	282509.0	283961.0	NZ_CP008869.2	282008.0	282508.0		283962.0	284462.0	NC_002516.2	288142.0				289142.0	IS only present in query Strain.	1. DLIS	Partial IS hit.	HV98_RS01335	transposase	HV98_RS01345	IS3 family transposase	-	Intergenic/Pseudo/Repeaed Region	PA0257	hypothetical protein	6808844.0
Query:	LYT4	ASM1297170v1
Reference:	PAO1	NC_002516.2
IS:	IS222_IS3_IS3
	ISID	ISstart	ISend	Query.ID1	Start1	End1	Query.ID2	Start2	End2	REF.ID1	REF.Start1	REF.End1	REF.ID2	REF.Start2	REF.End2	Description	Observations	IS_Match_Type	QUERY_Flank1.locus_tag	QUERY_Flank1.Product	QUERY_Flank2.locus_tag	QUERY_Flank2.Product	REF_Flank1.locus_tag	REF.Product_Flank1	REF_Flank2.locus_tag	REF.Product_Flank2	Scaffold_Size
0	IS222_IS3_IS3	3427644.0	3428879.0	NC_002516.2	2225811.0				2226801.0	NZ_CP052759.1	3427143.0	3427643.0		3428880.0	3429380.0	IS only present in ref Strain.	1. DLIS	Complete IS hit.	PA2035	thiamine pyrophosphate protein	-	Intergenic/Pseudo/Repeaed Region	-	Intergenic/Pseudo/Repeaed Region	HH306_RS15960	thiamine pyrophosphate-binding protein	6680465.0
1	IS222_IS3_IS3	1061199.0	1062434.0	NC_002516.2	1060698.0	1061198.0		1062435.0	1062935.0							IS only present in query Strain.	6. Discarded for analysis. There were multiple blastn hits, and left and right pairs could not be determined.		-	Intergenic/Pseudo/Repeaed Region	PA0981	hypothetical protein	-	-	-	-	6264404.0
2	IS222_IS3_IS3	3537071.0	3538306.0	NZ_CP052759.1	3536570.0	3537070.0		3538307.0	3538807.0	NC_002516.2	2115819.0	2115946.0				IS only present in query Strain.	7. Discarded for analysis, blastn hits with low query coverage.		HH306_RS16460	DUF4354 family protein	HH306_RS16475	hypothetical protein	PA1934	hypothetical protein	-	-	6680465.0
3	IS222_IS3_IS3	2118520.0	2119755.0	NC_002516.2	2118019.0	2118519.0		2119756.0	2120256.0							IS only present in query Strain.	8. Not found by Blastn.		-	Intergenic/Pseudo/Repeaed Region	PA1939	hypothetical protein	-	-	-	-	6264404.0
Query:	CDN129	NZ_CP056774.1
Reference:	PAO1	NC_002516.2
IS:	ISAzvi4_IS110_IS1111
	ISID	ISstart	ISend	Query.ID1	Start1	End1	Query.ID2	Start2	End2	REF.ID1	REF.Start1	REF.End1	REF.ID2	REF.Start2	REF.End2	Description	Observations	IS_Match_Type	QUERY_Flank1.locus_tag	QUERY_Flank1.Product	QUERY_Flank2.locus_tag	QUERY_Flank2.Product	REF_Flank1.locus_tag	REF.Product_Flank1	REF_Flank2.locus_tag	REF.Product_Flank2	Scaffold_Size
0	ISAzvi4_IS110_IS1111	3153601.0	3154954.0	NC_002516.2	3116641.0				3117642.0	NZ_CP056774.1	3153100.0	3153600.0		3154955.0	3155455.0	IS only present in ref Strain.	1. DLIS	Complete IS hit.	-	Intergenic/Pseudo/Repeaed Region	-	Intergenic/Pseudo/Repeaed Region	-	Intergenic/Pseudo/Repeaed Region	-	Intergenic/Pseudo/Repeaed Region	6770626.0
1	ISAzvi4_IS110_IS1111	3387797.0	3389150.0	NC_002516.2	3343229.0				3344242.0	NZ_CP056774.1	3387296.0	3387796.0		3389151.0	3389651.0	IS only present in ref Strain.	1. DLIS	Complete IS hit.	PA2985	hypothetical protein	PA2986	hypothetical protein	HWH78_RS15680	DUF2062 domain-containing protein	HWH78_RS15690	lipoprotein-releasing ABC transporter permease subunit	6770626.0
Query:	CMC-115	NZ_CP046602.1
Reference:	PAO1	NC_002516.2
IS:	ISPa57_IS3_IS3
	ISID	ISstart	ISend	Query.ID1	Start1	End1	Query.ID2	Start2	End2	REF.ID1	REF.Start1	REF.End1	REF.ID2	REF.Start2	REF.End2	Description	Observations	IS_Match_Type	QUERY_Flank1.locus_tag	QUERY_Flank1.Product	QUERY_Flank2.locus_tag	QUERY_Flank2.Product	REF_Flank1.locus_tag	REF.Product_Flank1	REF_Flank2.locus_tag	REF.Product_Flank2	Scaffold_Size
0	ISPa57_IS3_IS3	410918.0	412240.0	NC_002516.2	402536.0				403515.0	NZ_CP046602.1	410417.0	410917.0		412241.0	412741.0	IS only present in ref Strain.	1. DLIS	Complete IS hit.	PA0358	hypothetical protein	PA0360	hypothetical protein	GO602_RS01850	lysophospholipid acyltransferase family protein	GO602_RS01865	sel1 repeat family protein	6375262.0
1	ISPa57_IS3_IS3	2029293.0	2030615.0	NC_002516.2	1994118.0				1995116.0	NZ_CP046602.1	2028792.0	2029292.0		2030616.0	2031116.0	IS only present in ref Strain.	1. DLIS	Complete IS hit.	PA1836	transcriptional regulator	PA1837	hypothetical protein	GO602_RS09640	TetR/AcrR family transcriptional regulator	GO602_RS09650	DUF934 domain-containing protein	6375262.0
2	ISPa57_IS3_IS3	4870777.0	4872099.0	NC_002516.2	4751103.0				4752102.0	NZ_CP046602.1	4870276.0	4870776.0		4872100.0	4872600.0	IS only present in ref Strain.	1. DLIS	Complete IS hit.	PA4234	excinuclease ABC subunit A	PA4235	bacterioferritin	GO602_RS22715	excinuclease ABC subunit UvrA	GO602_RS22725	bacterioferritin	6375262.0
3	ISPa57_IS3_IS3	4953876.0	4955198.0	NC_002516.2	4832873.0				4833867.0	NZ_CP046602.1	4953375.0	4953875.0		4955199.0	4955699.0	IS only present in ref Strain.	1. DLIS	Complete IS hit.	PA4307	chemotactic transducer PctC	PA4308	hypothetical protein	GO602_RS23130	HAMP domain-containing protein	GO602_RS23140	DUF853 domain-containing protein	6375262.0
4	ISPa57_IS3_IS3	2674234.0	2675556.0							NZ_CP046602.1	2673733.0	2674233.0		2675557.0	2676057.0	IS only present in ref Strain.	8. Not found by Blastn.		-	-	-	-	GO602_RS12475	TonB-dependent siderophore receptor	GO602_RS12485	alpha/beta hydrolase	6375262.0
